# Supplementary material
Source: PubMed Central journal article supplement (PMC5540787)
Supplement: NIHMS862407-supplement-6.pdf [file NIHMS862407-supplement-6.pdf]

Supplementary Table S2. The RPPA antibody list

| #  | Official Ab Name            | Ab Name Reported on Dataset | Gene Name         | Company           | Catalog #   | Internal Ab ID | Species | Validation Status*                   | RPPA Dilution |
|----|-----------------------------|-----------------------------|-------------------|-------------------|-------------|----------------|---------|--------------------------------------|---------------|
| 1  | 14-3-3 beta                 | 14-3-3-beta                 | YWHA B            | Santa Cruz        | sc-628      | 882            | Rabbit  | Valid                                | 1:5000        |
| 2  | 14-3-3 epsilon              | 14-3-3-epsilon              | YWHA E            | Santa Cruz        | sc-23957    | 913            | Mouse   | Use with Caution                     | 1:100         |
| 3  | 14-3-3 zeta                 | 14-3-3-zeta                 | YWHA Z            | Santa Cruz        | sc-1019     | 883            | Rabbit  | Valid                                | 1:1200        |
| 4  | 4E-BP1                      | 4E-BP1                      | EIF4EBP1          | CST               | 9452        | 2              | Rabbit  | Valid                                | 1:100         |
| 5  | 4E-BP1_pS65                 | 4E-BP1_pS65                 | EIF4EBP1          | CST               | 9456        | 3              | Rabbit  | Valid                                | 1:250         |
| 6  | 4E-BP1_pT37_T46             | 4E-BP1_pT37_T46             | EIF4EBP1          | CST               | 9459        | 6              | Rabbit  | Valid                                | 1:100         |
| 7  | 53BP1                       | 53BP1                       | TP53BP1           | CST               | 4937        | 985            | Rabbit  | Valid                                | 1:200         |
| 8  | Acetyl CoA Carboxylase 1    | ACC1                        | ACACA             | Epitomics         | 1768-1      | 14             | Rabbit  | Under Evaluation                     | 1:300         |
| 9  | Acetyl-CoA Carboxylase_pS79 | ACC_pS79                    | ACACA<br>ACACB    | CST               | 3661        | 13             | Rabbit  | Valid                                | 1:250         |
| 10 | ACVRL1                      | ACVRL1                      | ACVRL1            | Abcam             | ab108207    | 1086           | Rabbit  | Use with Caution                     | 1:250         |
| 11 | ADAR1                       | ADAR1                       | ADAR              | Abcam             | ab88574     | 1198           | Mouse   | Valid                                | 1:1000        |
| 12 | Akt                         | Akt                         | AKT1 AKT2<br>AKT3 | CST               | 4691        | 1084           | Rabbit  | Valid                                | 1:1000        |
| 13 | Akt_pS473                   | Akt_pS473                   | AKT1 AKT2<br>AKT3 | CST               | 9271        | 230            | Rabbit  | Valid                                | 1:250         |
| 14 | Akt_pT308                   | Akt_pT308                   | AKT1 AKT2<br>AKT3 | CST               | 2965        | 1154           | Rabbit  | Valid                                | 1:250         |
| 15 | AMPKa                       | AMPK-alpha                  | PRKAA1            | CST               | 2532        | 39             | Rabbit  | Use with Caution                     | 1:250         |
| 16 | AMPKa_pT172                 | AMPK-alpha_pT172            | PRKAA1            | CST               | 2535        | 40             | Rabbit  | Valid                                | 1:750         |
| 17 | Androgen Receptor           | AR                          | AR                | Epitomics         | 1852-1      | 756            | Rabbit  | Valid                                | 1:100         |
| 18 | Annexin I                   | Annexin-I                   | ANXA1             | BD Biosciences    | 610066      | 1208           | Mouse   | Valid                                | 1:8000        |
| 19 | Annexin VII                 | Annexin-VII                 | ANXA7             | BD Biosciences    | 610668      | 1142           | Mouse   | Valid                                | 1:500         |
| 20 | A-Raf                       | A-Raf                       | ARAF              | CST               | 4432        | 1217           | Rabbit  | Valid                                | 1:1000        |
| 21 | ARHI                        | ARHI                        | DIRAS3            | MDACC Laboratory  | Bast Lab    | 1273           | Mouse   | Use with Caution                     | 1:500         |
| 22 | ATM                         | ATM                         | ATM               | CST               | 2873        | 1363           | Rabbit  | Valid                                | 1:750         |
| 23 | ATM_pS1981                  | ATM_pS1981                  | ATM               | CST               | 5883        | 1364           | Rabbit  | Valid                                | 1:250         |
| 24 | ATP5H                       | ATP5H                       | ATP5H             | Abcam             | ab110275    | 1252           | Mouse   | Use with Caution                     | 1:750         |
| 25 | ATR                         | ATR                         | ATR               | CST               | 2790        | 900            | Rabbit  | Caution                              | 1:200         |
| 26 | Bad_pS112                   | Bad_pS112                   | BAD               | CST               | 9291        | 63             | Rabbit  | Valid                                | 1:100         |
| 27 | Bak                         | Bak                         | BAK1              | Epitomics         | 1542-1      | 71             | Rabbit  | Use with Caution                     | 1:200         |
| 28 | BAP1                        | BAP1                        | BAP1              | Santa Cruz        | sc-28383    | 1207           | Mouse   | Valid                                | 1:500         |
| 29 | Bax                         | Bax                         | BAX               | CST               | 2772        | 73             | Rabbit  | Valid                                | 1:250         |
| 30 | BCL2                        | Bcl2                        | BCL2              | Dako              | M0887       | 80             | Mouse   | Valid                                | 1:200         |
| 31 | Bcl-xL                      | Bcl-xL                      | BCL2L1            | CST               | 2762        | 85             | Rabbit  | Valid                                | 1:250         |
| 32 | Beclin                      | Beclin                      | BECN1             | Santa Cruz        | sc-10086    | 87             | Goat    | Use with Caution                     | 1:100         |
| 33 | beta-Catenin                | b-Catenin                   | CTNNB1            | CST               | 9562        | 75             | Rabbit  | Valid                                | 1:300         |
| 34 | beta-Catenin_pT41_S45       | b-Catenin_pT41_S45          | CTNNB1            | CST               | 9565        | 1170           | Rabbit  | Valid                                | 1:500         |
| 35 | Bid                         | Bid                         | BID               | Abcam             | ab32060     | 88             | Rabbit  | Use with Caution                     | 1:100         |
| 36 | Bim                         | Bim                         | BCL2L11           | Abcam             | ab32158     | 90             | Rabbit  | Valid                                | 1:500         |
| 37 | B-Raf                       | B-Raf                       | BRAF              | Santa Cruz        | sc-5284     | 96             | Mouse   | Use with Caution                     | 1:250         |
| 38 | B-Raf_pS445                 | B-Raf_pS445                 | BRAF              | CST               | 2696        | 94             | Rabbit  | Valid                                | 1:500         |
| 39 | BRCA2                       | BRCA2                       | BRCA2             | CST               | 9012        | 761            | Rabbit  | Use with Caution                     | 1:100         |
| 40 | Caspase-7 cleavedD198       | Caspase-7-cleaved           | CASP7             | CST               | 9491        | 109            | Rabbit  | Use with Caution                     | 1:150         |
| 41 | Caspase-8                   | Caspase-8                   | CASP8             | CST               | 9746        | 951            | Mouse   | **Used for QC**                      | 1:300         |
| 42 | Caveolin-1                  | Caveolin-1                  | CAV1              | CST               | 3238        | 114            | Rabbit  | Valid                                | 1:250         |
| 43 | CD29                        | CD29                        | ITGB1             | BD Biosciences    | 610467      | 1206           | Mouse   | Valid                                | 1:500         |
| 44 | CD31                        | CD31                        | PECAM1            | Dako              | M0823       | 127            | Mouse   | Valid                                | 1:500         |
| 45 | CD49b                       | CD49b                       | ITGA2             | BD Biosciences    | 611016      | 937            | Mouse   | Valid                                | 1:250         |
| 46 | cdc2/CDK1                   | CDK1                        | CDC2-CDK1         | CST               | 9112        | 1007           | Rabbit  | Valid                                | 1:250         |
| 47 | CDKN2A/p16INK4a             | p16INK4a                    | CDKN2A            | Abcam             | ab81278     | 1231           | Rabbit  | Valid                                | 1:1000        |
| 48 | Chk1                        | Chk1                        | CHEK1             | CST               | 2360        | 1203           | Mouse   | Use with Caution                     | 1:1000        |
| 49 | Chk1_pS345                  | Chk1_pS345                  | CHEK1             | CST               | 2348        | 903            | Rabbit  | Use with Caution                     | 1:200         |
| 50 | Chk2                        | Chk2                        | CHEK2             | CST               | 3440        | 146            | Mouse   | Valid                                | 1:250         |
| 51 | Chk2_pT68                   | Chk2_pT68                   | CHEK2             | CST               | 2197        | 147            | Rabbit  | Use with Caution                     | 1:100         |
| 52 | c-Jun_pS73                  | c-Jun_pS73                  | JUN               | CST               | 9164        | 155            | Rabbit  | Valid                                | 1:100         |
| 53 | c-Kit                       | c-Kit                       | KIT               | Abcam             | ab32363     | 157            | Rabbit  | Valid                                | 1:1000        |
| 54 | Claudin 7                   | Claudin-7                   | CLDN7             | Novus Biologicals | NB100-91714 | 852            | Rabbit  | Valid                                | 1:250         |
| 55 | c-Met                       | c-Met                       | MET               | CST               | 3127        | 726            | Mouse   | **Used for QC**                      | 1:500         |
| 56 | c-Met_pY1234_Y1235          | c-Met_pY1234_Y1235          | MET               | CST               | 3129        | 727            | Rabbit  | Valid                                | 1:100         |
| 57 | c-Myc                       | c-Myc                       | MYC               | Santa Cruz        | sc-764      | 1143           | Rabbit  | Use with Caution                     | 1:500         |
| 58 | COL6A1                      | Collagen-VI                 | COL6A1            | Santa Cruz        | sc-20649    | 171            | Rabbit  | Valid                                | 1:200         |
| 59 | Complex II Subunit          | Complex-II-Subunit          | SDHA              | Invitrogen        | 459230      | 1069           | Mouse   | Valid                                | 1:300         |
| 60 | Cox IV                      | Cox-IV                      | COX4I1            | Abcam             | ab14744     | 1253           | Mouse   | Use with Caution                     | 1:750         |
| 61 | Cox2                        | Cox2                        | PTGS2             | CST               | 4842        | 1218           | Rabbit  | Use with Caution                     | 1:500         |
| 62 | C-Raf/Raf-1                 | C-Raf                       | RAF1              | Millipore         | 04-739      | 1201           | Rabbit  | Valid                                | 1:200         |
| 63 | C-Raf_pS338                 | C-Raf_pS338                 | RAF1              | CST               | 9427        | 179            | Rabbit  | Valid                                | 1:250         |
| 64 | Cyclin B1                   | Cyclin-B1                   | CCNB1             | Epitomics         | 1495-1      | 192            | Rabbit  | Valid                                | 1:500         |
| 65 | Cyclin D1                   | Cyclin-D1                   | CCND1             | Santa Cruz        | sc-718      | 194            | Rabbit  | Valid                                | 1:1000        |
| 66 | Cyclin E1                   | Cyclin-E1                   | CCNE1             | Santa Cruz        | sc-247      | 201            | Mouse   | Valid                                | 1:500         |
| 67 | Cyclophilin F               | Cyclophilin-F               | PIPF              | Abcam             | ab110324    | 1257           | Mouse   | Valid                                | 1:250         |
| 68 | Dvl3                        | Dvl3                        | DVL3              | CST               | 3218        | 940            | Rabbit  | Valid                                | 1:1000        |
| 69 | E2F-1                       | E2F1                        | E2F1              | Santa Cruz        | sc-251      | 1261           | Mouse   | Valid                                | 1:500         |
| 70 | E-Cadherin                  | E-Cadherin                  | CDH1              | CST               | 3195        | 1099           | Rabbit  | Valid                                | 1:250         |
| 71 | eEF2                        | eEF2                        | EEF2              | CST               | 2332        | 1060           | Rabbit  | Use with Caution                     | 1:200         |
| 72 | eEF2K                       | eEF2K                       | EEF2K             | CST               | 3692        | 1061           | Rabbit  | Valid                                | 1:200         |
| 73 | EGFR                        | EGFR                        | EGFR              | CST               | 2232        | 1120           | Rabbit  | Valid                                | 1:100         |
| 74 | EGFR_pY1068                 | EGFR_pY1068                 | EGFR              | CST               | 2234        | 217            | Rabbit  | Use with Caution;<br>also sees pHer2 | 1:100         |
| 75 | EGFR_pY1173                 | EGFR_pY1173                 | EGFR              | Abcam             | ab32578     | 221            | Rabbit  | Valid                                | 1:300         |
| 76 | eIF4E                       | eIF4E                       | EIF4E             | CST               | 9742        | 722            | Rabbit  | Valid                                | 1:1000        |

|     |                         |                   |                  |                   |             |      |        |                                        |         |
|-----|-------------------------|-------------------|------------------|-------------------|-------------|------|--------|----------------------------------------|---------|
| 77  | eIF4G                   | eIF4G             | EIF4G1           | CST               | 2498        | 1124 | Rabbit | Use with Caution                       | 1:100   |
| 78  | ER alpha_pS118          | ER-alpha_pS118    | ESR1             | Epitomics         | 1091-1      | 241  | Rabbit | Valid                                  | 1:500   |
| 79  | ErbB2/HER2              | HER2              | ERBB2            | Lab Vision        | MS-325-P1   | 1038 | Mouse  | Valid                                  | 1:7500  |
| 80  | ErbB2/HER2_pY1248       | HER2_pY1248       | ERBB2            | R&D Systems       | AF1768      | 1075 | Rabbit | Use with Caution;<br>likely sees pEGFR | 1:500   |
| 81  | ErbB3/HER3              | HER3              | ERBB3            | Santa Cruz        | sc-285      | 911  | Rabbit | Valid                                  | 1:150   |
| 82  | ErbB3/HER3_pY1289       | HER3_pY1289       | ERBB3            | CST               | 4791        | 728  | Rabbit | Use with Caution                       | 1:50    |
| 83  | ERCC1                   | ERCC1             | ERCC1            | Santa Cruz        | sc-17809    | 1357 | Mouse  | Valid                                  | 1:250   |
| 84  | ERRF1/MIG6              | MIG6              | ERRF1            | Sigma-Aldrich     | WH0054206M1 | 1062 | Mouse  | Valid                                  | 1:2500  |
| 85  | Estrogen Receptor       | ER-alpha          | ESR1             | Lab Vision        | RM-9101-S   | 238  | Rabbit | Valid                                  | 1:250   |
| 86  | Ets-1                   | Ets-1             | ETS1             | Bethyl            | A303-501A   | 1200 | Rabbit | Valid                                  | 1:750   |
| 87  | FAK                     | FAK               | PTK2             | CST               | 3285        | 1228 | Rabbit | Under Evaluation                       | 1:500   |
| 88  | FAK_pY397               | FAK_pY397         | PTK2             | CST               | 3283        | 1227 | Rabbit | Valid                                  | 1:250   |
| 89  | Fatty Acid Synthase     | FASN              | FASN             | CST               | 3180        | 1156 | Rabbit | Valid                                  | 1:1000  |
| 90  | Fibronectin             | Fibronectin       | FN1              | Epitomics         | 1574-1      | 262  | Rabbit | Valid                                  | 1:5000  |
| 91  | FoxM1                   | FoxM1             | FOXO3            | CST               | 5436        | 1123 | Rabbit | Valid                                  | 1:250   |
| 92  | FoxO3a                  | FoxO3a            | FOXO3            | CST               | 2497        | 1122 | Rabbit | Use with Caution                       | 1:250   |
| 93  | FoxO3a_pS318_S321       | FoxO3a_pS318_S321 | FOXO3            | CST               | 9465        | 270  | Rabbit | Use with Caution                       | 1:250   |
| 94  | G6PD                    | G6PD              | G6PD             | Santa Cruz        | sc-373887   | 1155 | Mouse  | Valid                                  | 1:250   |
| 95  | Gab2                    | Gab2              | GAB2             | CST               | 3239        | 943  | Rabbit | Valid                                  | 1:200   |
| 96  | GAPDH                   | GAPDH             | GAPDH            | Life Technologies | AM4300      | 274  | Mouse  | Use with Caution                       | 1:15000 |
| 97  | GATA3                   | GATA3             | GATA3            | BD Biosciences    | 558686      | 764  | Mouse  | Valid                                  | 1:500   |
| 98  | GCN5L2                  | GCN5L2            | KAT2A            | CST               | 3305        | 1263 | Rabbit | Valid                                  | 1:200   |
| 99  | Glycogen Synthase       | Gys               | GY51             | CST               | 3886        | 1035 | Rabbit | Valid                                  | 1:2500  |
| 100 | Glycogen Synthase_pS641 | Gys_pS641         | GY51             | CST               | 3891        | 1036 | Rabbit | Valid                                  | 1:300   |
| 101 | GPBB                    | GPBB              | PYGB             | Novus Biologicals | NBP1-32799  | 1248 | Rabbit | Valid                                  | 1:1000  |
| 102 | GSK-3alpha/beta         | GSK-3ab           | GSK3A<br>GSK3B   | Santa Cruz        | sc-7291     | 284  | Mouse  | Valid                                  | 1:2000  |
| 103 | GSK-3alpha/beta_pS21_S9 | GSK-3ab_pS21_S9   | GSK3A<br>GSK3B   | CST               | 9331        | 285  | Rabbit | Valid                                  | 1:250   |
| 104 | GSK-3beta_pS9           | GSK-3b_pS9        | GSK3B            | CST               | 9336        | 1082 | Rabbit | Valid                                  | 1:500   |
| 105 | Heregulin               | Heregulin         | NRG1             | CST               | 2573        | 890  | Rabbit | Valid                                  | 1:250   |
| 106 | HIAP                    | HIAP              | BIRC2            | Millipore         | 07-759      | 930  | Rabbit | Use with Caution                       | 1:200   |
| 107 | Histone H3              | Histone-H3        | H3F3A<br>H3F3B   | Abcam             | ab1791      | 1250 | Rabbit | Valid                                  | 1:500   |
| 108 | IGF-1Receptor beta      | IGF1R-beta        | IGF1R            | CST               | 3018        | 1220 | Rabbit | Valid                                  | 1:500   |
| 109 | IGFBP2                  | IGFBP2            | IGFBP2           | CST               | 3922        | 335  | Rabbit | Valid                                  | 1:100   |
| 110 | INPP4b                  | INPP4b            | INPP4B           | CST               | 4039        | 1065 | Rabbit | Valid                                  | 1:500   |
| 111 | IRS1                    | IRS1              | IRS1             | Millipore         | 06-248      | 802  | Rabbit | Valid                                  | 1:250   |
| 112 | JAB1                    | JAB1              | COP55            | Santa Cruz        | sc-13157    | 1394 | Mouse  | Use with Caution                       | 1:500   |
| 113 | JNK/SAPK_pT183_Y185     | JNK_pT183_Y185    | MAPK8            | CST               | 4668        | 888  | Rabbit | Valid                                  | 1:250   |
| 114 | JNK2                    | JNK2              | MAPK9            | CST               | 4672        | 380  | Rabbit | Use with Caution                       | 1:100   |
| 115 | KMT3A/HYPB/HIF 1        | SETD2             | SETD2            | Abcam             | ab69836     | 1039 | Rabbit | **Used for QC**                        | 1:100   |
| 116 | Lck                     | Lck               | LCK              | CST               | 2752        | 397  | Rabbit | Valid                                  | 1:500   |
| 117 | MAPK_pt202_Y204         | MAPK_pt202_Y204   | MAPK1<br>MAPK3   | CST               | 4377        | 405  | Rabbit | Valid                                  | 1:1200  |
| 118 | Mcl 1                   | Mcl-1             | MCL1             | CST               | 5453        | 1222 | Rabbit | Valid                                  | 1:1000  |
| 119 | MDM2_pS166              | MDM2_pS166        | MDM2             | CST               | 3521        | 1164 | Rabbit | Valid                                  | 1:200   |
| 120 | MEK1                    | MEK1              | MAP2K1           | Epitomics         | 1235-1      | 417  | Rabbit | Valid                                  | 1:15000 |
| 121 | MEK1_pS217_S221         | MEK1_pS217_S221   | MAP2K1<br>MAP2K2 | CST               | 9154        | 1076 | Rabbit | Valid                                  | 1:2000  |
| 122 | MEK2                    | MEK2              | MAP2K2           | CST               | 9125        | 1243 | Rabbit | Valid                                  | 1:500   |
| 123 | Merlin/NF2              | Merlin            | NF2              | Novus Biologicals | 22710002    | 1046 | Rabbit | Use with Caution                       | 1:400   |
| 124 | MSH2                    | MSH2              | MSH2             | CST               | 2850        | 905  | Mouse  | Valid                                  | 1:250   |
| 125 | MSH6                    | MSH6              | MSH6             | Novus Biologicals | 22030002    | 1063 | Rabbit | Use with Caution                       | 1:500   |
| 126 | mTOR                    | mTOR              | MTOR             | CST               | 2983        | 444  | Rabbit | Valid                                  | 1:400   |
| 127 | mTOR_pS2448             | mTOR_pS2448       | MTOR             | CST               | 2971        | 446  | Rabbit | Use with Caution                       | 1:200   |
| 128 | Myosin heavy chain 11   | Myosin-11         | MYH11            | Novus Biologicals | 21370002    | 1139 | Rabbit | Valid                                  | 1:1000  |
| 129 | Myosin IIa_pS1943       | Myosin-IIa_pS1943 | MYH9             | CST               | 5026        | 1160 | Rabbit | Valid                                  | 1:1000  |
| 130 | NAPSIN A                | NAPSIN-A          | NAPSA            | Abcam             | ab129189    | 1274 | Rabbit | Use with Caution                       | 1:1000  |
| 131 | N-Cadherin              | N-Cadherin        | CDH2             | CST               | 4061        | 452  | Rabbit | Valid                                  | 1:100   |
| 132 | NDRG1_pT346             | NDRG1_pT346       | NDRG1            | CST               | 3217        | 1126 | Rabbit | Valid                                  | 1:500   |
| 133 | NF-kappaB p65_pS536     | NF-kb-p65_pS536   | RELA             | CST               | 3033        | 457  | Rabbit | Use with Caution                       | 1:250   |
| 134 | Notch1                  | Notch1            | NOTCH1           | CST               | 3268        | 1064 | Rabbit | Valid                                  | 1:100   |
| 135 | N-Ras                   | N-Ras             | NRAS             | Santa Cruz        | sc-31       | 1136 | Mouse  | Valid                                  | 1:250   |
| 136 | p21                     | p21               | CDKN1A           | Santa Cruz        | sc-397      | 470  | Rabbit | Valid                                  | 1:100   |
| 137 | p27 KIP 1               | p27-Kip-1         | CDKN1B           | Abcam             | ab32034     | 897  | Rabbit | Valid                                  | 1:250   |
| 138 | p27 KIP 1_pT198         | p27_pT198         | CDKN1B           | Abcam             | ab64949     | 878  | Rabbit | Valid                                  | 1:250   |
| 139 | p27/Kip1_pT157          | p27_pT157         | CDKN1B           | R&D Systems       | AF1555      | 842  | Rabbit | Use with Caution                       | 1:150   |
| 140 | p38 alpha MAPK          | p38-alpha         | MAPK14           | CST               | 9228        | 1175 | Mouse  | Valid                                  | 1:500   |
| 141 | p38 MAPK                | p38               | MAPK14           | CST               | 9212        | 478  | Rabbit | Valid                                  | 1:250   |
| 142 | p38 MAPK_pT180_Y182     | p38_pT180_Y182    | MAPK14           | CST               | 9211        | 479  | Rabbit | Valid                                  | 1:250   |
| 143 | p53                     | p53               | TP53             | CST               | 9282        | 481  | Rabbit | Use with Caution                       | 1:500   |
| 144 | p70 S6 Kinase_pT389     | p70-S6K_pT389     | RPS6KB1          | CST               | 9205        | 494  | Rabbit | Valid                                  | 1:250   |
| 145 | p70/S6K1                | p70-S6K1          | RPS6KB1          | Epitomics         | 1494-1      | 493  | Rabbit | Valid                                  | 1:250   |
| 146 | PAI-1                   | PAI-1             | SERPINE1         | BD Biosciences    | 612024      | 499  | Mouse  | Valid                                  | 1:100   |
| 147 | PARK7/DJ1               | DJ1               | PARK7            | Abcam             | ab76008     | 891  | Rabbit | Valid                                  | 1:5000  |
| 148 | PARP cleavedD214        | PARP-cleaved      | PARP1            | CST               | 9546        | 501  | Mouse  | **Used for QC**                        | 1:250   |
| 149 | PARP-1                  | PARP1             | PARP1            | Santa Cruz        | sc-7150     | 1372 | Rabbit | Valid                                  | 1:1000  |
| 150 | Paxillin                | Paxillin          | PXN              | Epitomics         | 1500-1      | 505  | Rabbit | Use with Caution                       | 1:1500  |
| 151 | PCNA                    | PCNA              | PCNA             | Abcam             | ab29        | 511  | Mouse  | Use with Caution                       | 1:100   |
| 152 | Pdcd-1L1                | Pdcd-1L1          | CD274            | Santa Cruz        | sc-19090    | 1234 | Goat   | Use with Caution                       | 1:500   |
| 153 | Pdcd4                   | Pdcd4             | PDCD4            | Rockland          | 600-401-965 | 816  | Rabbit | Use with Caution                       | 1:400   |

|     |                       |                   |                                                    |                   |           |      |        |                  |         |
|-----|-----------------------|-------------------|----------------------------------------------------|-------------------|-----------|------|--------|------------------|---------|
| 154 | PDGFR beta            | PDGFR-beta        | PDGFRB                                             | CST               | 3169      | 1225 | Rabbit | Valid            | 1:250   |
| 155 | PK1                   | PK1               | PDPK1                                              | CST               | 3062      | 515  | Rabbit | Valid            | 1:100   |
| 156 | PK1_pS241             | PK1_pS241         | PDPK1                                              | CST               | 3061      | 516  | Rabbit | Valid            | 1:500   |
| 157 | PEA-15                | PEA-15            | PEA15                                              | CST               | 2780      | 1017 | Rabbit | Valid            | 1:500   |
| 158 | PED/PEA-15_pS116      | PEA-15_pS116      | PEA15                                              | Invitrogen        | 44-836G   | 1018 | Rabbit | Valid            | 1:400   |
| 159 | PI3 Kinase p110 alpha | PI3K-p110-alpha   | PIK3CA                                             | CST               | 4255      | 808  | Rabbit | Use with Caution | 1:200   |
| 160 | PI3K p85              | PI3K-p85          | PIK3R1                                             | Millipore         | 06-195    | 523  | Rabbit | Valid            | 1:4000  |
| 161 | PKC alpha             | PKC-alpha         | PRKCA                                              | Millipore         | 05-154    | 529  | Mouse  | Valid            | 1:2000  |
| 162 | PKC alpha_pS657       | PKC-alpha_pS657   | PRKCA                                              | Millipore         | 06-822    | 530  | Rabbit | Use with Caution | 1:3000  |
| 163 | PKC beta II_pS660     | PKC-beta-II_pS660 | PRKCA<br>PRKCB<br>PRKCD<br>PRKCE<br>PRKCH<br>PRKCO | CST               | 9371      | 1137 | Rabbit | Valid            | 1:75    |
| 164 | PKC delta_pS664       | PKC-delta_pS664   | PRKCD                                              | Millipore         | 07-875    | 932  | Rabbit | Valid            | 1:500   |
| 165 | PMS2                  | PMS2              | PMS2                                               | Novus Biologicals | 22510002  | 1246 | Rabbit | Valid            | 1:1000  |
| 166 | PRAS40_pT246          | PRAS40_pT246      | AKT1S1                                             | Life Technologies | 441100G   | 739  | Rabbit | Valid            | 1:10000 |
| 167 | PREX1                 | PREX1             | PREX1                                              | Abcam             | ab102739  | 1204 | Rabbit | Valid            | 1:1000  |
| 168 | Progesterone Receptor | PR                | PGR                                                | Abcam             | ab32085   | 549  | Rabbit | Valid            | 1:250   |
| 169 | PTEN                  | PTEN              | PTEN                                               | CST               | 9552      | 566  | Rabbit | Valid            | 1:500   |
| 170 | Rab11                 | Rab11             | RAB11A<br>RAB11B                                   | CST               | 3539      | 1083 | Rabbit | Under Evaluation | 1:50    |
| 171 | Rab25                 | Rab25             | RAB25                                              | CST               | 4314      | 1150 | Rabbit | Valid            | 1:250   |
| 172 | Rad50                 | Rad50             | RAD50                                              | Millipore         | 05-525    | 987  | Mouse  | Valid            | 1:1000  |
| 173 | Rad51                 | Rad51             | RAD51                                              | CST               | 8875      | 1262 | Rabbit | Valid            | 1:200   |
| 174 | Raptor                | Raptor            | RPTOR                                              | CST               | 2280      | 1128 | Rabbit | Valid            | 1:250   |
| 175 | Rb                    | Rb                | RB1                                                | CST               | 9309      | 552  | Mouse  | **Used for QC**  | 1:3000  |
| 176 | Rb_pS807_S811         | Rb_pS807_S811     | RB1                                                | CST               | 9308      | 557  | Rabbit | Valid            | 1:250   |
| 177 | RBM15                 | RBM15             | RBM15                                              | Novus Biologicals | 21390002  | 1138 | Rabbit | Valid            | 1:10000 |
| 178 | Rictor                | Rictor            | RICTOR                                             | CST               | 2114      | 1129 | Rabbit | Use with Caution | 1:200   |
| 179 | Rictor_pT1135         | Rictor_pT1135     | RICTOR                                             | CST               | 3806      | 1130 | Rabbit | Valid            | 1:200   |
| 180 | RSK                   | RSK               | RPS6KA1<br>RPS6KA2<br>RPS6KA3                      | CST               | 9347      | 759  | Rabbit | Use with Caution | 1:500   |
| 181 | S6_pS235_S236         | S6_pS235_S236     | RPS6                                               | CST               | 2211      | 600  | Rabbit | Valid            | 1:30000 |
| 182 | S6_pS240_S244         | S6_pS240_S244     | RPS6                                               | CST               | 2215      | 601  | Rabbit | Valid            | 1:3000  |
| 183 | SCD                   | SCD               | SCD                                                | Santa Cruz        | sc-58420  | 1127 | Mouse  | Valid            | 1:100   |
| 184 | SF2/ASF               | SF2               | SRSF1                                              | Invitrogen        | 32-4500   | 1131 | Mouse  | Valid            | 1:100   |
| 185 | Shc_pY317             | Shc_pY317         | SHC1                                               | CST               | 2431      | 1031 | Rabbit | Valid            | 1:1000  |
| 186 | Smac/Diablo           | Smac              | DIABLO                                             | CST               | 2954      | 610  | Mouse  | **Used for QC**  | 1:250   |
| 187 | Smad1                 | Smad1             | SMAD1                                              | Epitomics         | 1649-1    | 922  | Rabbit | Valid            | 1:250   |
| 188 | Smad3                 | Smad3             | SMAD3                                              | Abcam             | ab40854   | 796  | Rabbit | Valid            | 1:150   |
| 189 | Smad4                 | Smad4             | SMAD4                                              | Santa Cruz        | sc-7966   | 920  | Mouse  | Valid            | 1:250   |
| 190 | Snail                 | Snail             | SNAIL                                              | CST               | 3895      | 616  | Mouse  | **Used for QC**  | 1:300   |
| 191 | Src                   | Src               | SRC                                                | Millipore         | 05-184    | 621  | Mouse  | Valid            | 1:200   |
| 192 | Src Family_pY416      | Src_pY416         | SRC<br>LYN<br>FYN<br>LCK<br>YES1<br>HCK            | CST               | 2101      | 623  | Rabbit | Use with Caution | 1:250   |
| 193 | Src_pY527             | Src_pY527         | SRC<br>YES1<br>FYN<br>FGR                          | CST               | 2105      | 626  | Rabbit | Valid            | 1:400   |
| 194 | Stat3_pY705           | Stat3_pY705       | STAT3                                              | CST               | 9131      | 637  | Rabbit | Valid            | 1:500   |
| 195 | Stat5a                | Stat5a            | STAT5A                                             | Abcam             | ab32043   | 638  | Rabbit | Valid            | 1:250   |
| 196 | Stathmin 1            | Stathmin-1        | STMN1                                              | Abcam             | ab52630   | 718  | Rabbit | Valid            | 1:500   |
| 197 | Syk                   | Syk               | SYK                                                | Santa Cruz        | sc-1240   | 1033 | Mouse  | Valid            | 1:250   |
| 198 | TAZ                   | TAZ               | WWTR1                                              | CST               | 2149      | 777  | Rabbit | Valid            | 1:500   |
| 199 | TIGAR                 | TIGAR             | C12ORF5                                            | Abcam             | ab137573  | 1107 | Rabbit | Valid            | 1:150   |
| 200 | Transferrin Receptor  | TFRC              | TFRC                                               | Novus Biologicals | 22500002  | 1140 | Rabbit | Valid            | 1:100   |
| 201 | Transglutaminase II   | Transglutaminase  | TGM2                                               | Lab Vision        | MS-224-P1 | 908  | Mouse  | Valid            | 1:750   |
| 202 | TSC1/Hamartin         | TSC1              | TSC1                                               | CST               | 4906      | 1125 | Rabbit | Use with Caution | 1:100   |
| 203 | TSC2 Tuberin_pT1462   | Tuberin_pT1462    | TSC2                                               | CST               | 3617      | 671  | Rabbit | Valid            | 1:500   |
| 204 | TTF1                  | TTF1              | NKX2-1                                             | Abcam             | ab76013   | 1081 | Rabbit | Valid            | 1:250   |
| 205 | Tuberin               | Tuberin           | TSC2                                               | Epitomics         | 1613-1    | 670  | Rabbit | Valid            | 1:500   |
| 206 | Twist                 | TWIST             | TWIST2                                             | Santa Cruz        | sc-81417  | 1353 | Mouse  | Caution          | 1:200   |
| 207 | Tyro3                 | Tyro3             | TYRO3                                              | CST               | 5585      | 1080 | Rabbit | Valid            | 1:500   |
| 208 | UBAC1                 | UBAC1             | UBAC1                                              | Sigma-Aldrich     | HPA005651 | 1270 | Rabbit | Valid            | 1:750   |
| 209 | UGT1A                 | UGT1A             | UGT1A1                                             | Santa Cruz        | sc-271268 | 1267 | Mouse  | Valid            | 1:500   |
| 210 | UQCRC2                | UQCRC2            | UQCRC2                                             | Abcam             | ab14745   | 1256 | Mouse  | Use with Caution | 1:250   |
| 211 | VDAC1/Porin           | Porin             | VDAC1                                              | Abcam             | ab14734   | 1254 | Mouse  | Valid            | 1:3000  |
| 212 | VEGF Receptor 2       | VEGFR-2           | KDR                                                | CST               | 2479      | 688  | Rabbit | Valid            | 1:700   |
| 213 | XRCC1                 | XRCC1             | XRCC1                                              | CST               | 2735      | 906  | Rabbit | Use with Caution | 1:200   |
| 214 | YAP                   | YAP               | YAP1                                               | Santa Cruz        | sc-15407  | 780  | Rabbit | Under Evaluation | 1:750   |
| 215 | YAP_pS127             | YAP_pS127         | YAP1                                               | CST               | 4911      | 782  | Rabbit | Under Evaluation | 1:250   |
| 216 | YB1                   | YB1               | YBX1                                               | Novus Biologicals | 17250002  | 700  | Rabbit | Valid            | 1:500   |
| 217 | YB1_pS102             | YB1_pS102         | YBX1                                               | CST               | 2900      | 835  | Rabbit | Valid            | 1:250   |

## Validation Status\*

Valid = RPPA and WB correlation &gt; 0.7

Use with Caution = RPPA and WB correlation < 0.7

Under Evaluation = Antibody has given mixed results and / or evaluated by another lab; We are in the process of (re)validating

Used for QC = These antibodies are used for tissue sample quality control (QC); WILL NOT report to Datasets containing tissue samples, but WILL report to Datasets containing cell line samples
